# Supplementary material
Source: PubMed Central journal article supplement (PMC7170522)
Supplement: supp_RA119.012296_157689_2_supp_485327_q6l1fv.pdf [file supp_RA119.012296_157689_2_supp_485327_q6l1fv.pdf]

***Supporting Information***

12-LOX catalyzes the oxidation of 2-arachidonoyl-lysolipids in platelets generating eicosanoid-lysolipids that are attenuated by iPLA<sub>2</sub> $\gamma$  knockout

**Xinping Liu<sup>1</sup>, Harold F. Sims<sup>1</sup>, Christopher M. Jenkins<sup>1</sup>, Shaoping Guan<sup>1</sup>, Beverly G. Dilthey<sup>1</sup>, and Richard W. Gross<sup>\*1,2,3</sup>**

From the <sup>1</sup>Division of Bioorganic Chemistry and Molecular Pharmacology, Department of Medicine, Washington University School of Medicine, Saint Louis, MO 63110; <sup>2</sup>Department of Developmental Biology, Washington University School of Medicine, Saint Louis, MO 63110; <sup>3</sup>Department of Chemistry, Washington University, Saint Louis, MO 63130

Running Title: *Eicosanoid-lysophospholipids are attenuated by iPLA<sub>2</sub> $\gamma$  knockout*

\*To whom correspondence should be addressed: Richard W. Gross, M.D., Ph.D. Division of Bioorganic Chemistry and Molecular Pharmacology, Washington University School of Medicine, 660 S. Euclid Ave., Campus Box 8020, St. Louis, MO 63110; rgross@wustl.edu; Tel.: 314-362-2690; Fax: 314-362-1402.

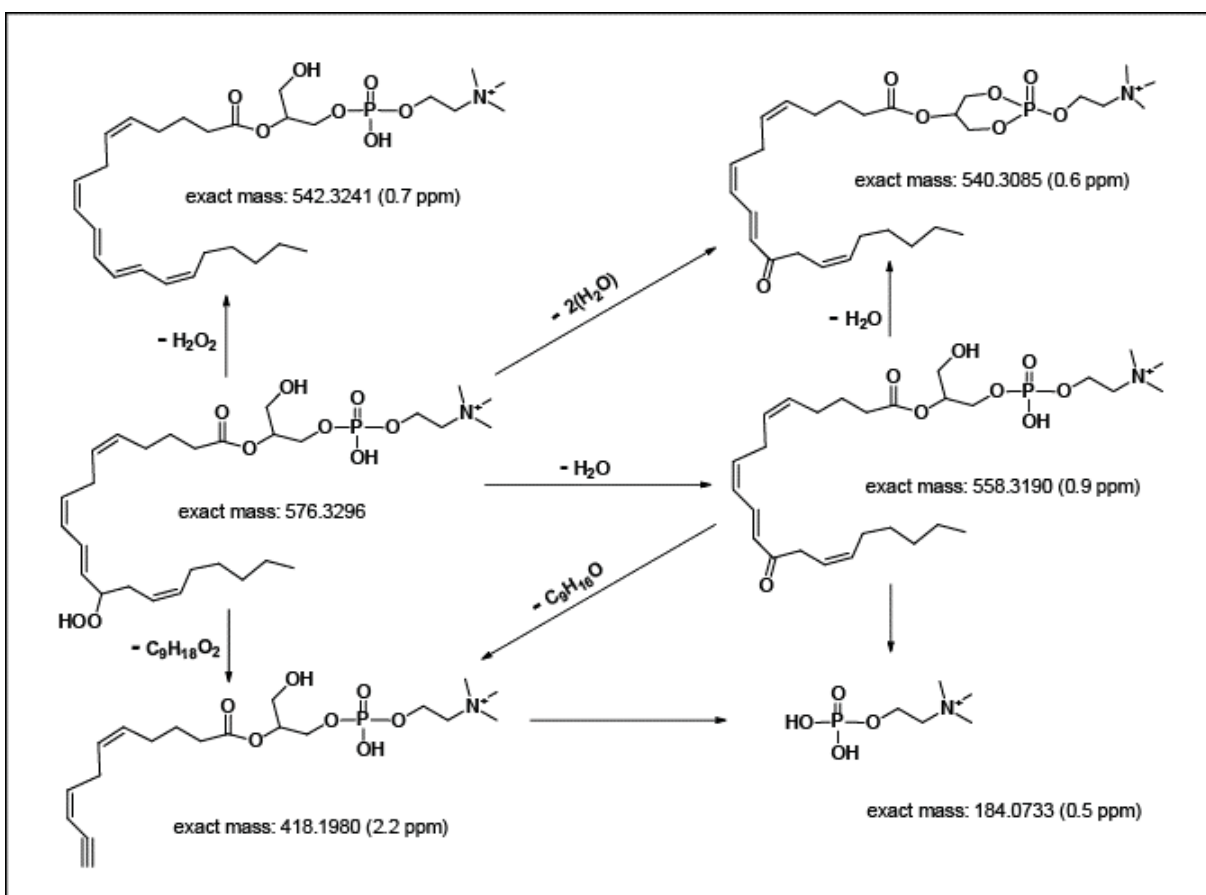

**Supplementary Fig. 1.** Proposed fragmentation pathways upon collision induced dissociation (CID) leading to the observed accurate mass product ions for 12-hydroperoxyl-eicosatetraenoic-lysophosphatidylcholine (12-HpETE-LPC). The product ion  $m/z$  418.1980 is derived from the unique fragmentation occurring at the labile hydroperoxide bond. Exact masses are calculated theoretical masses; numbers in parentheses indicate the measured mass error in parts per million (ppm) relative to the calculated theoretical mass.

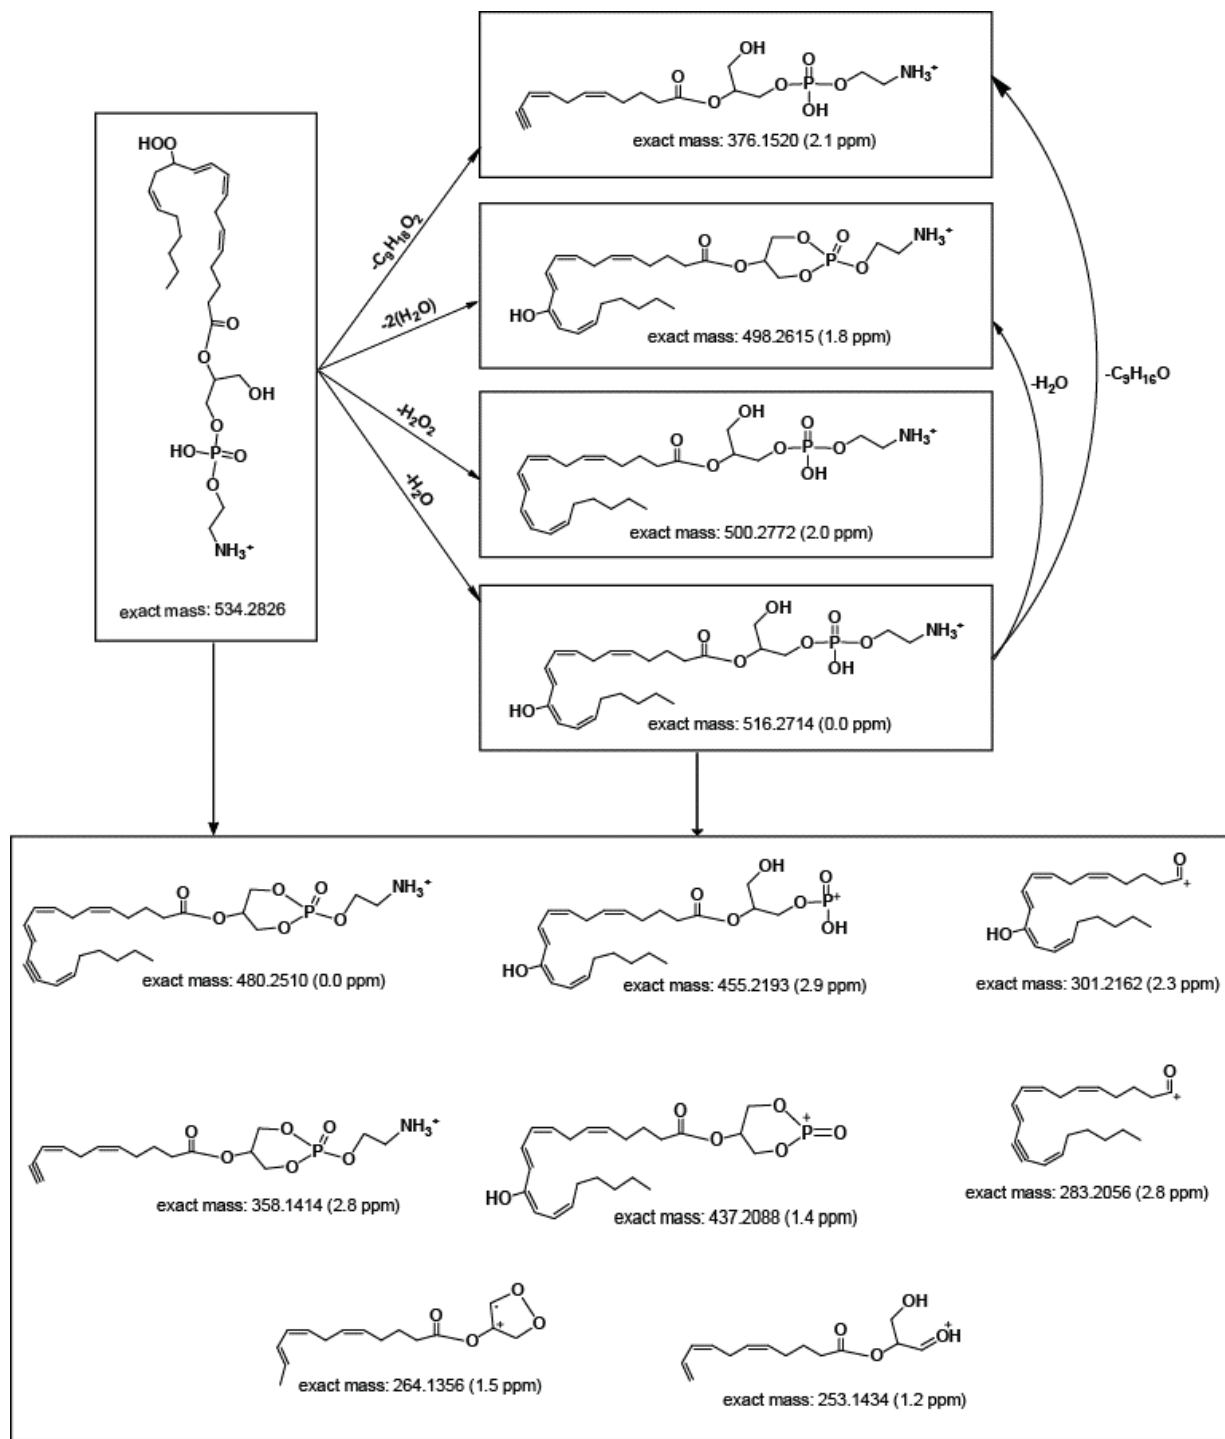

**Supplementary Fig. 2.** Proposed fragmentation pathways upon collision induced dissociation (CID) leading to the observed accurate mass product ions for 12-hydroperoxy-eicosatetraenoic-lysophosphatidylethanolamine (12-HpETE-LPE). The product ion  $m/z$  376.1520 is derived from the unique fragmentation occurring at the labile hydroperoxide bond. Exact masses are calculated theoretical masses; numbers in parentheses indicate the measured mass error in parts per million (ppm) relative to the calculated theoretical mass.

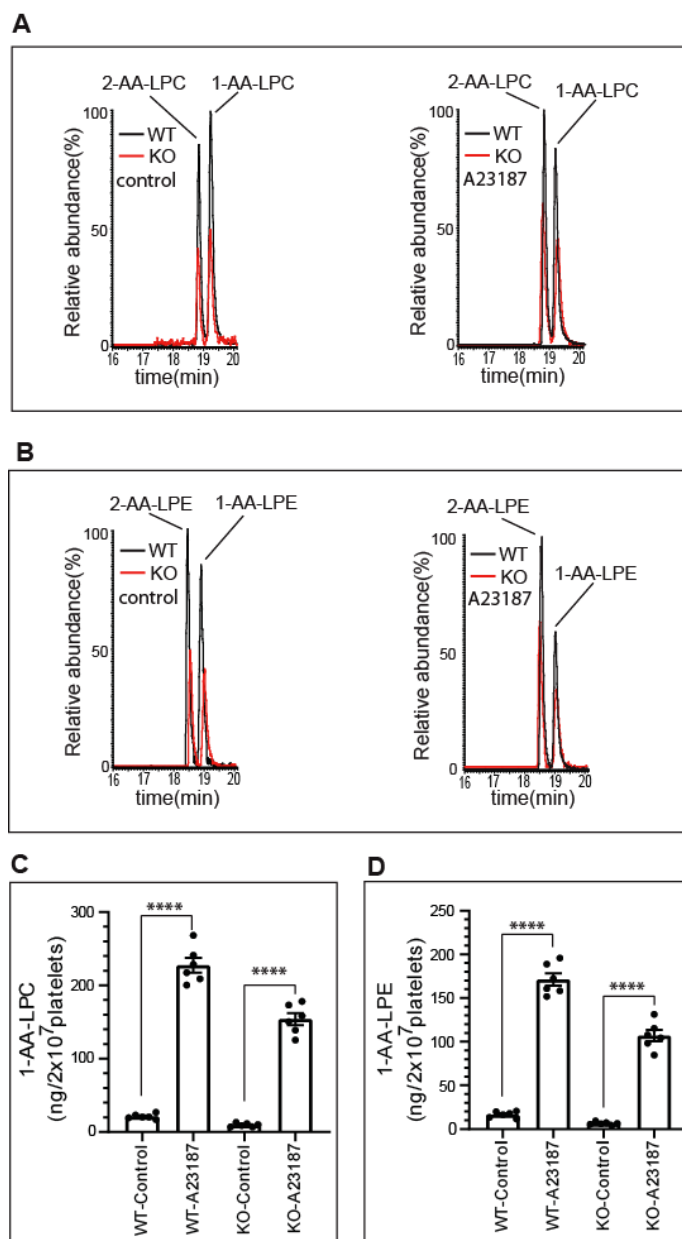

**Supplementary Fig. 3. Production of 1-AA-LPC and 1-AA-LPE in murine platelets from wild-type (WT) and iPLA<sub>2</sub> $\gamma$  knockout (KO) mice stimulated with calcium ionophore A23187.** Washed platelets were incubated in the presence or absence of calcium ionophore A23187 at 37°C for 15 min followed by extraction of lipids using a modified Bligh and Dyer procedure and analysis by HPLC-MS/MS. **A**, Representative of LC/MS traces for 1-AA-LPC in the absence (**Control**) or presence (**A23187**) of calcium ionophore A23187 in platelets from WT or KO mice; **B**, Representative of LC/MS traces for 1-AA-LPE in the absence (**Control**) or presence (**A23187**) of calcium ionophore A23187 in platelets from WT or KO mice; **C**, content of 1-AA-LPC in the absence (**Control**) or presence (**A23187**) of calcium ionophore A23187 in platelets from WT or KO mice; **D**, content of 1-AA-LPE in the absence (**Control**) or presence (**A23187**) of calcium ionophore A23187 in platelets from WT or KO mice. Data are expressed as mean values  $\pm$  SEM of six independent replicates. Statistical analyses were performed using an unpaired two-tailed Student *t* test. Statistically significant *p* values are indicated above the bracketed data sets (\*\*\*\* *p*<0.0001).

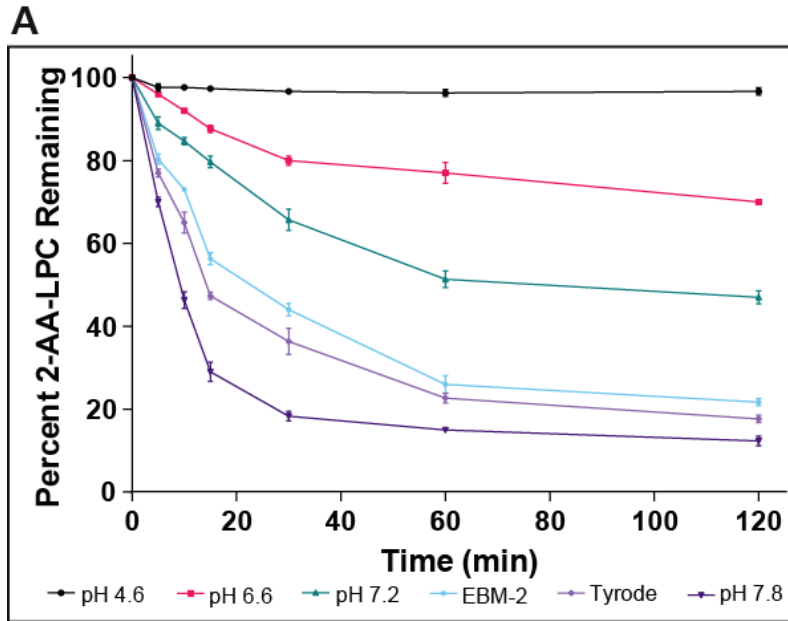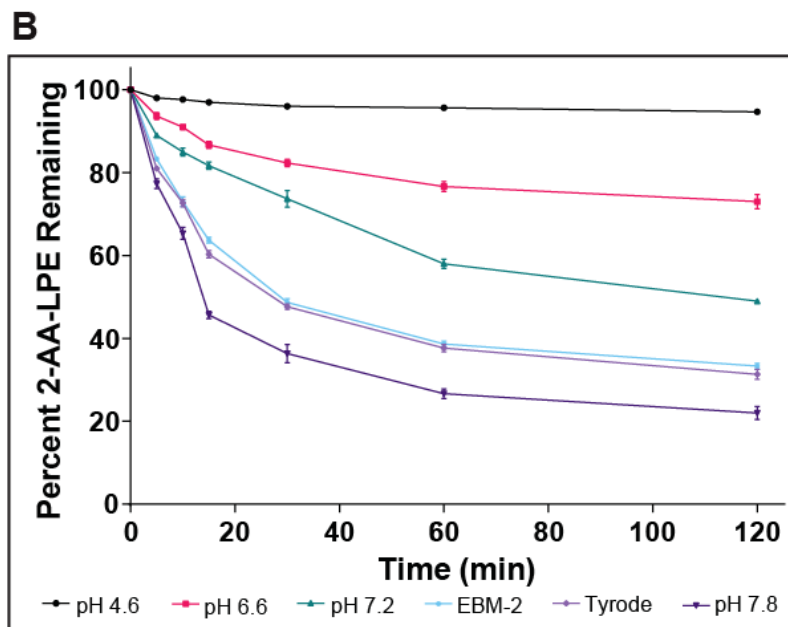

**Supplementary Fig. 4. pH dependent kinetics of *sn*-2 to *sn*-1 acyl migration for 2-AA-LPC and 2-AA-LPE to 1-AA-LPC and 1-AA-LPE (respectively).** For each reaction, 2-AA-LPC or 2-AA-LPE was added to 1.0 ml of the selected medium or buffer (EBM-2 culture medium, Tyrode's buffer, 0.05 M Citrate-sodium citrate buffer (pH 4.6 and pH 6.6) or 0.05 M Tris-HCl buffer (pH7.2 and pH7.8) to give a final concentration of 10  $\mu$ M, and the resulting mixture was incubated at 37°C for the indicated times. The quantities of 1- or 2-AA-lysophospholipids were then determined for the indicated time points by LC-MS. Plots of remaining 2-AA-LPC (A) or 2-AA-LPE (B) are shown as a percent of total 1- and 2-AA-LPC or 1- and 2-AA-LPE versus time, respectively. Each curve represents the mean  $\pm$  SEM from three replicate experiments.

**Supplementary Table 1.** Measured apparent  $K_m$  and  $V_{max}$  values for 12-HpETE-lysophospholipid products formed upon oxidation of 2-AA-LPC and 2-AA-LPE with human platelet-type 12-LOX (h12LOX) or mouse platelet-type 12-LOX (m12-LOX). Data are expressed as mean values  $\pm$  SEM of three replicates.

| Enzyme  | Substrate | Product      | $K_m$<br>( $\mu$ M) | $V_{max}$<br>(nmol s <sup>-1</sup> mg <sup>-1</sup> ) |
|---------|-----------|--------------|---------------------|-------------------------------------------------------|
| m12-LOX | 2-AA-LPC  | 12-HpETE-LPC | 14 ( $\pm$ 4)       | 48 ( $\pm$ 6)                                         |
| m12-LOX | 2-AA-LPE  | 12-HpETE-LPE | 13 ( $\pm$ 2)       | 33 ( $\pm$ 5)                                         |
| h12-LOX | 2-AA-LPC  | 12-HpETE-LPC | 12 ( $\pm$ 3)       | 50 ( $\pm$ 8)                                         |
| h12-LOX | 2-AA-LPE  | 12-HpETE-LPE | 9 ( $\pm$ 1)        | 27 ( $\pm$ 6)                                         |
